# Supplementary material
Source: ML conference proceedings conference paper supplement (https://openaccess.thecvf.com/content/ICCV2021/html/Levis_Inference_of_Black_ICCV_2021_paper.html)
Supplement: Supplementary file 2 [file Levis_Inference_of_Black_ICCV_2021_supplemental.zip]

Archive with 2 entries (2 files):
- ICCV2021_supplemental_text.pdf
- ICCV2021_supplemental_clip.mp4
